# Supplementary material for: The Use of DArTseq Technology to Identify New SNP and SilicoDArT Markers Related to the Yield-Related Traits Components in Maize
Source: MDPI journal article supplement (doi:10.3390/genes13050848), 2022-05-10
Supplement: s1 [file s1]

**Table S1:** Mean for all lines for all analyzed features in the villages of Kobierzyce and Smolice.

| No. | Name | experimentation in Smolice |                   |                  |                    |                             |                               |                                |                                   |            | experimentation in Kobierzyce |                   |                  |                    |                             |                               |                                |                                   |            |
|-----|------|----------------------------|-------------------|------------------|--------------------|-----------------------------|-------------------------------|--------------------------------|-----------------------------------|------------|-------------------------------|-------------------|------------------|--------------------|-----------------------------|-------------------------------|--------------------------------|-----------------------------------|------------|
|     |      | cob length [cm]            | cob diameter [cm] | core length [cm] | core diameter [cm] | the number of rows of grain | the number of grains in a row | mass of grain from the cob [g] | weight of one thousand grains [g] | yield [kg] | cob length [cm]               | cob diameter [cm] | core length [cm] | core diameter [cm] | the number of rows of grain | the number of grains in a row | mass of grain from the cob [g] | weight of one thousand grains [g] | yield [kg] |
| 1   | S001 | 14.3                       | 4.9               | 14.0             | 2.6                | 15.3                        | 22.7                          | 125.0                          | 398.3                             | 5.0        | 15.7                          | 4.6               | 15.3             | 2.3                | 16.7                        | 26.7                          | 159.9                          | 361.2                             | 6.40       |
| 2   | S002 | 12.0                       | 4.1               | 12.0             | 2.1                | 13.3                        | 21.3                          | 101.5                          | 392.3                             | 4.1        | 13.9                          | 4.3               | 13.4             | 2.1                | 14.0                        | 26.3                          | 138.5                          | 379.4                             | 5.54       |
| 3   | S003 | 14.3                       | 3.9               | 14.3             | 2.3                | 15.3                        | 30.3                          | 102.3                          | 234.0                             | 4.1        | 16.8                          | 4.1               | 16.6             | 2.2                | 17.3                        | 34.7                          | 157.0                          | 262.1                             | 6.28       |
| 4   | S004 | 14.3                       | 4.1               | 14.0             | 2.2                | 13.3                        | 26.3                          | 105.6                          | 320.7                             | 4.2        | 15.4                          | 4.0               | 15.4             | 2.0                | 15.3                        | 26.7                          | 126.4                          | 310.4                             | 5.05       |
| 5   | S005 | 14.7                       | 3.9               | 14.7             | 2.3                | 13.3                        | 30.3                          | 106.3                          | 285.0                             | 4.3        | 16.2                          | 3.9               | 16.6             | 2.2                | 14.7                        | 30.7                          | 122.9                          | 275.8                             | 4.91       |
| 6   | S006 | 15.0                       | 4.3               | 15.0             | 2.4                | 15.3                        | 25.7                          | 93.1                           | 244.7                             | 3.7        | 16.4                          | 3.8               | 16.5             | 2.2                | 15.3                        | 29.0                          | 128.7                          | 289.4                             | 5.15       |
| 7   | S007 | 13.3                       | 4.2               | 13.3             | 2.6                | 17.3                        | 24.0                          | 101.0                          | 304.3                             | 4.0        | 15.7                          | 4.4               | 15.6             | 2.7                | 18.0                        | 26.7                          | 123.3                          | 256.6                             | 4.93       |
| 8   | S008 | 17.0                       | 4.2               | 17.0             | 2.5                | 14.7                        | 27.3                          | 124.0                          | 332.7                             | 5.0        | 19.0                          | 3.9               | 18.7             | 2.3                | 16.0                        | 30.0                          | 133.7                          | 278.4                             | 5.35       |
| 9   | S009 | 12.7                       | 4.3               | 12.7             | 2.4                | 16.0                        | 25.0                          | 113.3                          | 322.7                             | 4.5        | 14.6                          | 4.1               | 14.1             | 2.3                | 16.7                        | 31.7                          | 134.9                          | 256.5                             | 5.40       |
| 10  | S010 | 14.7                       | 4.2               | 14.3             | 2.0                | 15.3                        | 28.3                          | 113.8                          | 287.7                             | 4.6        | 15.7                          | 3.8               | 15.4             | 2.0                | 16.7                        | 32.7                          | 146.7                          | 270.0                             | 5.87       |
| 11  | S011 | 13.3                       | 4.3               | 13.2             | 2.6                | 16.0                        | 23.7                          | 97.5                           | 290.0                             | 3.9        | 14.8                          | 4.3               | 15.1             | 2.3                | 16.7                        | 26.7                          | 116.5                          | 266.2                             | 4.66       |
| 12  | S012 | 14.7                       | 4.3               | 14.2             | 1.2                | 14.0                        | 28.7                          | 124.6                          | 333.3                             | 5.0        | 17.0                          | 4.1               | 17.0             | 2.1                | 14.7                        | 33.0                          | 165.0                          | 342.4                             | 6.60       |
| 13  | S013 | 17.3                       | 3.9               | 16.7             | 1.2                | 14.0                        | 29.3                          | 97.5                           | 260.0                             | 3.9        | 18.2                          | 3.7               | 17.5             | 2.2                | 16.0                        | 30.0                          | 116.9                          | 244.1                             | 4.67       |
| 14  | S014 | 16.0                       | 4.2               | 16.3             | 1.1                | 14.7                        | 27.3                          | 86.3                           | 229.3                             | 3.5        | 17.3                          | 4.2               | 17.3             | 2.5                | 15.3                        | 34.0                          | 150.2                          | 287.8                             | 6.01       |
| 15  | S015 | 12.7                       | 3.9               | 12.7             | 0.9                | 10.7                        | 17.0                          | 55.7                           | 319.3                             | 2.2        | 14.0                          | 4.0               | 14.1             | 2.2                | 12.7                        | 26.3                          | 106.6                          | 322.2                             | 4.27       |
| 16  | S016 | 13.0                       | 4.4               | 12.7             | 0.9                | 16.7                        | 29.0                          | 99.0                           | 231.7                             | 4.0        | 13.7                          | 4.1               | 13.5             | 2.2                | 16.0                        | 30.0                          | 109.7                          | 231.9                             | 4.39       |
| 17  | S017 | 14.7                       | 4.7               | 14.3             | 1.0                | 17.3                        | 26.0                          | 106.9                          | 301.7                             | 4.3        | 15.3                          | 4.0               | 15.0             | 2.0                | 18.0                        | 30.7                          | 121.8                          | 221.2                             | 4.87       |
| 18  | S018 | 15.0                       | 4.6               | 14.8             | 1.0                | 20.7                        | 28.0                          | 95.9                           | 204.7                             | 3.8        | 16.5                          | 4.7               | 16.1             | 2.6                | 21.3                        | 33.3                          | 145.1                          | 201.6                             | 5.80       |
| 19  | S019 | 12.3                       | 4.1               | 12.0             | 1.0                | 16.0                        | 24.0                          | 79.9                           | 268.0                             | 3.2        | 14.7                          | 4.1               | 14.7             | 2.2                | 15.3                        | 27.0                          | 112.8                          | 271.4                             | 4.51       |
| 20  | S020 | 13.3                       | 3.5               | 13.3             | 0.8                | 13.3                        | 23.3                          | 61.5                           | 262.7                             | 2.5        | 16.0                          | 3.8               | 15.5             | 2.1                | 14.7                        | 30.0                          | 122.5                          | 281.2                             | 4.90       |
| 21  | S021 | 13.0                       | 3.7               | 12.7             | 0.8                | 11.3                        | 20.7                          | 76.0                           | 368.0                             | 3.0        | 14.0                          | 3.5               | 13.7             | 1.8                | 12.0                        | 22.7                          | 94.8                           | 346.8                             | 3.79       |
| 22  | S022 | 13.3                       | 4.4               | 13.2             | 2.4                | 17.3                        | 24.3                          | 114.9                          | 325.3                             | 4.6        | 14.0                          | 4.4               | 13.5             | 2.4                | 18.0                        | 25.0                          | 123.3                          | 273.6                             | 4.93       |
| 23  | S023 | 14.7                       | 3.7               | 14.3             | 2.4                | 12.0                        | 24.7                          | 76.5                           | 328.7                             | 3.1        | 14.9                          | 3.2               | 15.3             | 2.0                | 12.0                        | 26.7                          | 69.7                           | 218.7                             | 2.79       |
| 24  | S024 | 16.3                       | 3.3               | 16.3             | 2.0                | 12.0                        | 28.3                          | 78.2                           | 274.7                             | 3.1        | 17.2                          | 3.2               | 17.2             | 1.7                | 14.0                        | 29.3                          | 100.6                          | 244.3                             | 4.02       |
| 25  | S025 | 13.3                       | 4.0               | 13.3             | 2.3                | 14.0                        | 26.0                          | 95.0                           | 313.7                             | 3.8        | 13.7                          | 4.0               | 13.2             | 2.1                | 16.0                        | 26.7                          | 112.0                          | 261.6                             | 4.48       |
| 26  | S026 | 14.3                       | 3.9               | 14.0             | 2.0                | 16.0                        | 29.0                          | 102.5                          | 252.0                             | 4.1        | 14.8                          | 3.3               | 14.5             | 1.6                | 14.7                        | 29.3                          | 105.3                          | 243.0                             | 4.21       |
| 27  | S027 | 13.7                       | 3.3               | 14.0             | 1.9                | 12.7                        | 24.7                          | 58.3                           | 243.3                             | 2.3        | 15.1                          | 3.1               | 14.8             | 1.8                | 12.0                        | 24.0                          | 71.2                           | 245.8                             | 2.85       |
| 28  | S028 | 13.0                       | 3.5               | 14.0             | 2.0                | 13.3                        | 24.3                          | 70.9                           | 283.3                             | 2.8        | 16.2                          | 3.9               | 16.7             | 1.9                | 16.0                        | 31.7                          | 133.0                          | 263.4                             | 5.32       |
| 29  | S029 | 11.7                       | 3.7               | 12.0             | 1.9                | 12.7                        | 21.7                          | 78.1                           | 337.0                             | 3.1        | 15.3                          | 3.7               | 14.7             | 1.7                | 13.3                        | 28.3                          | 119.0                          | 314.2                             | 4.76       |
| 30  | S030 | 13.7                       | 4.2               | 14.3             | 2.3                | 12.7                        | 29.7                          | 112.0                          | 327.0                             | 4.5        | 16.5                          | 4.0               | 16.3             | 2.1                | 14.7                        | 26.7                          | 121.2                          | 316.2                             | 4.85       |
| 31  | S031 | 13.0                       | 4.3               | 13.3             | 2.4                | 15.3                        | 25.7                          | 111.2                          | 312.7                             | 4.4        | 14.0                          | 4.1               | 13.8             | 2.0                | 14.0                        | 24.3                          | 98.0                           | 284.4                             | 3.92       |
| 32  | S032 | 12.0                       | 3.9               | 11.8             | 2.5                | 14.7                        | 20.7                          | 83.0                           | 314.7                             | 3.3        | 12.8                          | 4.3               | 13.0             | 2.4                | 18.0                        | 23.7                          | 115.1                          | 270.2                             | 4.60       |

|    |      |      |     |      |     |      |      |       |       |     |      |     |      |     |      |      |       |       |      |
|----|------|------|-----|------|-----|------|------|-------|-------|-----|------|-----|------|-----|------|------|-------|-------|------|
| 33 | S033 | 12.0 | 4.0 | 12.7 | 2.5 | 14.7 | 28.7 | 81.8  | 218.0 | 3.3 | 14.8 | 4.4 | 14.8 | 2.6 | 16.7 | 29.3 | 128.5 | 264.3 | 5.14 |
| 34 | S034 | 14.0 | 4.5 | 13.5 | 2.4 | 18.7 | 27.7 | 117.2 | 267.0 | 4.7 | 15.5 | 4.7 | 15.6 | 2.2 | 21.3 | 29.3 | 125.6 | 195.5 | 5.02 |
| 35 | S035 | 12.3 | 4.6 | 12.2 | 2.7 | 19.3 | 25.3 | 101.7 | 246.0 | 4.1 | 15.7 | 4.9 | 15.7 | 2.6 | 22.0 | 26.7 | 126.0 | 213.9 | 5.04 |
| 36 | S036 | 12.3 | 4.0 | 12.3 | 2.3 | 14.7 | 30.0 | 99.3  | 240.3 | 4.0 | 13.5 | 3.9 | 13.0 | 2.0 | 15.3 | 28.0 | 99.4  | 234.6 | 3.98 |
| 37 | S037 | 13.0 | 4.5 | 13.5 | 2.4 | 15.3 | 24.0 | 114.6 | 311.7 | 4.6 | 16.2 | 4.3 | 16.1 | 2.5 | 17.3 | 30.7 | 139.1 | 262.1 | 5.56 |
| 38 | S038 | 11.7 | 4.2 | 12.5 | 2.3 | 15.3 | 23.0 | 87.8  | 341.0 | 3.5 | 16.8 | 4.1 | 16.8 | 2.2 | 15.3 | 30.0 | 122.6 | 266.0 | 4.91 |
| 39 | S039 | 12.7 | 4.6 | 12.8 | 2.6 | 14.7 | 27.0 | 111.1 | 322.7 | 4.4 | 14.3 | 4.8 | 14.4 | 2.7 | 17.3 | 26.0 | 146.2 | 325.1 | 5.85 |
| 40 | S040 | 11.3 | 4.5 | 12.2 | 2.5 | 16.0 | 19.7 | 95.4  | 377.3 | 3.8 | 16.7 | 4.5 | 16.5 | 2.4 | 15.3 | 29.3 | 140.1 | 311.7 | 5.60 |
| 41 | S041 | 15.3 | 4.5 | 15.5 | 2.6 | 16.7 | 32.0 | 119.9 | 250.3 | 4.8 | 16.4 | 4.5 | 15.9 | 2.5 | 20.0 | 30.0 | 130.5 | 218.1 | 5.22 |
| 42 | S042 | 14.3 | 3.4 | 15.3 | 2.0 | 12.7 | 26.7 | 81.5  | 296.7 | 3.3 | 16.5 | 3.6 | 16.4 | 1.9 | 14.7 | 29.0 | 99.9  | 225.1 | 4.00 |
| 43 | S043 | 11.0 | 4.2 | 11.3 | 2.1 | 14.7 | 22.7 | 88.1  | 325.3 | 3.5 | 12.0 | 3.8 | 12.5 | 1.9 | 13.3 | 23.3 | 88.0  | 282.4 | 3.52 |
| 44 | S044 | 10.0 | 4.6 | 10.7 | 2.6 | 17.3 | 19.0 | 80.7  | 297.7 | 3.2 | 14.0 | 4.8 | 14.1 | 3.1 | 18.0 | 22.0 | 109.7 | 277.3 | 4.39 |
| 45 | S045 | 13.3 | 4.4 | 14.0 | 2.4 | 16.7 | 28.7 | 116.0 | 298.0 | 4.6 | 17.3 | 4.2 | 16.8 | 2.2 | 18.0 | 36.0 | 136.4 | 210.5 | 5.46 |
| 46 | S046 | 13.0 | 3.6 | 13.3 | 2.2 | 14.0 | 23.3 | 70.4  | 275.7 | 2.8 | 15.4 | 3.4 | 15.5 | 2.1 | 12.0 | 24.0 | 83.0  | 286.9 | 3.32 |
| 47 | S047 | 15.3 | 4.4 | 15.3 | 2.3 | 14.0 | 28.7 | 137.2 | 324.7 | 5.5 | 16.7 | 4.2 | 16.3 | 2.2 | 15.3 | 29.3 | 141.5 | 317.1 | 5.66 |
| 48 | S048 | 15.0 | 4.3 | 14.8 | 2.3 | 14.7 | 29.7 | 123.5 | 333.3 | 4.9 | 16.7 | 4.1 | 16.3 | 2.2 | 14.0 | 28.3 | 133.8 | 339.0 | 5.35 |
| 49 | S049 | 14.3 | 3.7 | 14.7 | 2.1 | 13.3 | 30.3 | 85.9  | 253.3 | 3.4 | 13.8 | 3.5 | 13.5 | 2.0 | 14.0 | 26.0 | 87.9  | 246.8 | 3.52 |
| 50 | S050 | 13.7 | 3.7 | 14.0 | 2.0 | 16.0 | 28.3 | 87.7  | 216.3 | 3.5 | 16.5 | 3.6 | 16.2 | 1.8 | 16.7 | 34.0 | 111.7 | 199.2 | 4.47 |
| 51 | S051 | 17.3 | 4.3 | 17.5 | 2.3 | 13.3 | 31.7 | 142.8 | 381.7 | 5.7 | 19.3 | 3.8 | 18.8 | 2.1 | 13.3 | 29.0 | 74.0  | 188.0 | 2.96 |
| 52 | S052 | 14.0 | 4.5 | 14.2 | 2.7 | 17.3 | 28.0 | 119.4 | 254.3 | 4.8 | 15.6 | 4.2 | 15.1 | 2.8 | 18.0 | 27.7 | 114.4 | 229.7 | 4.57 |
| 53 | S053 | 14.0 | 4.6 | 14.2 | 2.8 | 20.0 | 28.7 | 126.8 | 265.3 | 5.1 | 15.0 | 4.5 | 14.7 | 2.9 | 19.3 | 29.0 | 144.7 | 259.2 | 5.79 |
| 54 | S054 | 12.0 | 4.2 | 12.2 | 2.4 | 16.7 | 23.7 | 95.9  | 277.0 | 3.8 | 13.9 | 4.2 | 13.9 | 2.2 | 19.3 | 25.3 | 115.8 | 237.4 | 4.63 |
| 55 | S055 | 16.0 | 4.0 | 16.2 | 2.2 | 13.3 | 29.3 | 115.6 | 335.7 | 4.6 | 16.2 | 3.7 | 16.1 | 2.0 | 13.3 | 28.0 | 113.4 | 304.9 | 4.53 |
| 56 | S056 | 15.3 | 4.0 | 16.0 | 2.3 | 14.0 | 29.3 | 107.0 | 316.7 | 4.3 | 19.8 | 4.2 | 19.6 | 2.2 | 16.0 | 31.3 | 148.1 | 295.2 | 5.92 |
| 57 | S057 | 17.3 | 4.2 | 17.3 | 2.1 | 14.7 | 33.3 | 139.1 | 304.7 | 5.6 | 19.2 | 4.0 | 19.4 | 2.0 | 16.0 | 34.0 | 150.3 | 281.5 | 6.01 |
| 58 | S058 | 16.0 | 3.9 | 17.7 | 2.1 | 14.0 | 29.0 | 107.0 | 298.0 | 4.3 | 21.0 | 3.7 | 21.0 | 2.0 | 16.0 | 32.0 | 118.9 | 232.3 | 4.76 |
| 59 | S059 | 14.0 | 5.4 | 14.0 | 2.9 | 21.3 | 25.0 | 145.9 | 342.3 | 5.8 | 17.3 | 5.4 | 16.7 | 3.2 | 19.3 | 24.0 | 154.1 | 327.1 | 6.16 |
| 60 | S060 | 15.7 | 4.0 | 15.7 | 2.4 | 12.7 | 28.3 | 103.6 | 311.0 | 4.1 | 18.0 | 3.9 | 19.0 | 2.4 | 12.7 | 31.0 | 109.6 | 280.2 | 4.39 |
| 61 | S061 | 13.3 | 4.5 | 14.3 | 2.6 | 19.3 | 28.0 | 116.1 | 256.7 | 4.6 | 16.3 | 4.9 | 16.3 | 2.5 | 21.3 | 28.7 | 147.6 | 239.1 | 5.90 |
| 62 | S062 | 14.3 | 4.7 | 14.0 | 2.8 | 20.0 | 29.0 | 131.1 | 262.0 | 5.2 | 16.5 | 4.9 | 16.1 | 2.5 | 22.0 | 29.3 | 159.1 | 246.6 | 6.37 |
| 63 | S063 | 14.7 | 4.2 | 15.3 | 2.5 | 14.7 | 24.7 | 109.9 | 332.3 | 4.4 | 18.3 | 4.3 | 17.8 | 2.4 | 16.7 | 28.7 | 124.6 | 262.0 | 4.98 |
| 64 | S064 | 12.0 | 4.1 | 11.3 | 2.4 | 12.7 | 25.0 | 96.0  | 332.3 | 3.8 | 12.8 | 4.0 | 12.2 | 2.2 | 14.0 | 25.7 | 107.6 | 300.1 | 4.30 |
| 65 | S065 | 15.7 | 4.6 | 15.7 | 2.8 | 18.7 | 26.3 | 140.4 | 327.3 | 5.6 | 17.9 | 4.6 | 17.7 | 2.8 | 18.0 | 28.7 | 133.6 | 259.5 | 5.34 |
| 66 | S066 | 13.0 | 4.4 | 13.3 | 2.6 | 16.7 | 23.3 | 102.3 | 315.7 | 4.1 | 15.3 | 4.3 | 15.0 | 2.4 | 17.3 | 26.0 | 122.0 | 292.1 | 4.90 |
| 67 | S067 | 14.7 | 3.9 | 15.7 | 2.3 | 14.0 | 25.0 | 86.0  | 328.3 | 3.4 | 17.0 | 3.8 | 16.8 | 2.0 | 14.7 | 27.7 | 106.2 | 304.6 | 4.20 |
| 68 | S068 | 14.7 | 4.1 | 14.7 | 2.4 | 15.3 | 24.3 | 99.8  | 305.0 | 4.0 | 17.0 | 4.0 | 16.6 | 2.1 | 16.0 | 27.0 | 120.1 | 281.5 | 4.80 |
| 69 | S069 | 13.3 | 4.1 | 13.3 | 2.4 | 14.7 | 24.3 | 91.2  | 306.7 | 3.6 | 15.7 | 4.1 | 15.4 | 2.2 | 16.0 | 30.7 | 128.5 | 262.3 | 5.14 |
| 70 | S070 | 12.0 | 4.4 | 13.3 | 2.5 | 16.7 | 26.7 | 95.2  | 251.0 | 3.8 | 15.7 | 4.1 | 15.6 | 2.3 | 17.3 | 31.3 | 116.0 | 213.8 | 4.64 |
| 71 | S071 | 13.7 | 3.4 | 13.7 | 2.0 | 12.0 | 29.3 | 71.2  | 237.0 | 2.8 | 14.5 | 2.9 | 14.4 | 1.6 | 12.0 | 28.0 | 66.3  | 196.4 | 2.65 |
| 72 | S072 | 13.7 | 4.0 | 14.7 | 2.2 | 15.3 | 29.7 | 102.1 | 255.7 | 4.1 | 17.0 | 3.7 | 16.5 | 1.9 | 14.7 | 30.7 | 104.7 | 237.1 | 4.19 |

|     |      |      |     |      |     |      |      |       |       |     |      |     |      |     |      |      |       |       |      |
|-----|------|------|-----|------|-----|------|------|-------|-------|-----|------|-----|------|-----|------|------|-------|-------|------|
| 73  | S073 | 15.0 | 3.7 | 15.3 | 2.4 | 16.7 | 30.7 | 73.4  | 176.7 | 2.9 | 18.0 | 3.5 | 18.4 | 2.0 | 16.0 | 34.3 | 99.3  | 180.6 | 3.97 |
| 74  | S074 | 15.0 | 3.5 | 16.0 | 2.0 | 14.7 | 27.3 | 69.5  | 188.0 | 2.8 | 17.5 | 3.3 | 17.4 | 1.7 | 14.7 | 30.0 | 91.1  | 205.3 | 3.64 |
| 75  | S075 | 14.0 | 3.6 | 14.7 | 2.1 | 14.0 | 22.7 | 65.3  | 255.3 | 2.6 | 17.5 | 3.5 | 17.5 | 1.9 | 14.0 | 27.7 | 94.7  | 244.2 | 3.79 |
| 76  | S076 | 16.0 | 3.6 | 16.0 | 1.9 | 12.7 | 31.7 | 89.1  | 250.3 | 3.6 | 16.8 | 3.5 | 18.5 | 1.8 | 15.3 | 29.3 | 86.5  | 192.9 | 3.46 |
| 77  | S077 | 15.0 | 3.6 | 15.0 | 2.2 | 14.0 | 28.3 | 78.4  | 233.7 | 3.1 | 16.4 | 3.5 | 16.2 | 2.0 | 15.3 | 28.3 | 94.2  | 215.5 | 3.77 |
| 78  | S078 | 13.0 | 3.7 | 12.7 | 2.0 | 11.3 | 11.3 | 73.9  | 312.3 | 3.0 | 17.2 | 3.6 | 17.3 | 1.9 | 12.7 | 25.3 | 97.7  | 304.8 | 3.91 |
| 79  | S079 | 11.3 | 3.8 | 12.0 | 2.0 | 16.7 | 16.7 | 79.9  | 276.3 | 3.2 | 11.8 | 3.7 | 11.4 | 2.0 | 16.7 | 21.0 | 78.7  | 227.1 | 3.15 |
| 80  | S080 | 13.0 | 4.2 | 13.0 | 2.3 | 18.7 | 18.7 | 110.0 | 286.0 | 4.4 | 15.3 | 4.0 | 14.8 | 2.1 | 20.7 | 30.0 | 122.1 | 197.3 | 4.88 |
| 81  | S081 | 10.3 | 4.2 | 13.0 | 2.4 | 14.0 | 14.0 | 77.6  | 378.7 | 3.1 | 15.5 | 3.8 | 15.8 | 2.0 | 14.0 | 20.7 | 96.4  | 333.2 | 3.86 |
| 82  | S082 | 12.0 | 3.8 | 12.0 | 2.2 | 16.7 | 16.7 | 63.3  | 243.7 | 2.5 | 17.3 | 4.1 | 17.9 | 2.2 | 18.7 | 28.3 | 133.0 | 254.4 | 5.32 |
| 83  | S083 | 13.3 | 4.5 | 13.3 | 2.6 | 14.7 | 14.7 | 113.5 | 339.7 | 4.5 | 13.9 | 4.1 | 14.0 | 2.3 | 16.0 | 24.7 | 104.6 | 266.9 | 4.18 |
| 84  | S084 | 12.3 | 4.5 | 13.3 | 2.8 | 16.7 | 16.7 | 85.8  | 387.3 | 3.4 | 15.2 | 4.6 | 15.2 | 2.8 | 17.3 | 21.3 | 109.9 | 298.8 | 4.40 |
| 85  | S085 | 10.7 | 3.8 | 11.3 | 2.3 | 12.7 | 12.7 | 68.0  | 343.0 | 2.7 | 13.7 | 4.2 | 14.0 | 2.1 | 15.3 | 24.0 | 105.9 | 285.8 | 4.24 |
| 86  | S086 | 12.0 | 3.8 | 12.0 | 2.3 | 13.3 | 13.3 | 71.3  | 309.3 | 2.9 | 15.0 | 3.8 | 14.8 | 2.3 | 14.7 | 25.3 | 103.7 | 279.5 | 4.15 |
| 87  | S087 | 11.7 | 4.1 | 11.7 | 2.4 | 14.0 | 14.0 | 74.7  | 276.3 | 3.0 | 13.6 | 4.0 | 14.1 | 2.1 | 13.3 | 21.0 | 75.8  | 274.3 | 3.03 |
| 88  | S088 | 14.3 | 4.2 | 15.3 | 2.5 | 15.3 | 15.3 | 108.4 | 297.3 | 4.3 | 16.9 | 4.1 | 17.5 | 2.1 | 15.3 | 32.7 | 121.8 | 244.2 | 4.87 |
| 89  | S089 | 13.7 | 4.0 | 14.3 | 2.4 | 14.7 | 22.7 | 85.3  | 286.3 | 3.4 | 16.7 | 3.7 | 16.8 | 2.0 | 14.7 | 25.3 | 98.5  | 264.1 | 3.94 |
| 90  | S090 | 11.0 | 3.7 | 11.0 | 2.2 | 14.0 | 23.3 | 77.0  | 230.0 | 3.1 | 12.8 | 3.5 | 12.6 | 1.8 | 14.0 | 26.3 | 95.6  | 261.7 | 3.82 |
| 91  | S091 | 12.0 | 3.6 | 12.7 | 2.2 | 15.3 | 25.7 | 58.7  | 189.0 | 2.3 | 14.2 | 3.5 | 14.4 | 2.0 | 16.0 | 31.3 | 81.6  | 162.7 | 3.26 |
| 92  | S092 | 10.7 | 4.6 | 10.7 | 2.6 | 15.3 | 21.3 | 92.8  | 317.3 | 3.7 | 15.1 | 4.4 | 14.4 | 2.7 | 18.7 | 24.7 | 114.1 | 248.2 | 4.56 |
| 93  | S093 | 13.0 | 4.0 | 13.0 | 2.4 | 14.7 | 23.7 | 83.7  | 255.3 | 3.3 | 13.0 | 3.7 | 13.0 | 2.1 | 16.0 | 25.0 | 96.4  | 241.3 | 3.85 |
| 94  | S094 | 12.7 | 4.3 | 13.0 | 2.6 | 16.7 | 24.3 | 102.2 | 294.0 | 4.1 | 17.5 | 4.3 | 17.8 | 2.4 | 19.3 | 28.7 | 136.0 | 242.6 | 5.44 |
| 95  | S095 | 13.0 | 4.5 | 13.0 | 2.5 | 18.0 | 24.7 | 118.3 | 323.0 | 4.7 | 15.3 | 4.7 | 15.6 | 2.5 | 18.7 | 26.3 | 133.4 | 271.8 | 5.34 |
| 96  | S096 | 13.7 | 4.4 | 13.7 | 2.5 | 16.0 | 26.0 | 108.9 | 298.7 | 4.4 | 15.2 | 3.9 | 15.1 | 2.2 | 16.7 | 29.3 | 122.2 | 250.6 | 4.89 |
| 97  | S097 | 12.7 | 3.8 | 12.7 | 2.1 | 14.0 | 28.3 | 83.8  | 210.0 | 3.4 | 13.8 | 3.5 | 13.5 | 1.7 | 16.0 | 30.3 | 101.1 | 210.1 | 4.04 |
| 98  | S098 | 12.3 | 3.8 | 12.7 | 2.1 | 14.0 | 26.7 | 81.7  | 218.3 | 3.3 | 15.4 | 3.5 | 15.5 | 1.8 | 14.7 | 30.7 | 101.9 | 227.6 | 4.08 |
| 99  | S099 | 12.3 | 3.6 | 12.3 | 2.1 | 14.7 | 26.3 | 62.4  | 194.0 | 2.5 | 14.7 | 3.3 | 14.6 | 1.6 | 12.7 | 30.3 | 76.9  | 196.9 | 3.08 |
| 100 | S100 | 10.3 | 3.7 | 10.7 | 2.0 | 16.7 | 28.0 | 70.4  | 172.3 | 2.8 | 10.2 | 3.3 | 10.3 | 1.5 | 15.3 | 21.0 | 56.2  | 174.1 | 2.25 |
| 101 | S101 | 15.0 | 4.2 | 15.0 | 2.3 | 12.7 | 27.3 | 112.4 | 365.3 | 4.5 | 17.5 | 4.0 | 17.8 | 2.3 | 14.0 | 24.7 | 113.5 | 329.9 | 4.54 |
| 102 | S102 | 13.3 | 3.8 | 13.3 | 2.0 | 14.0 | 25.0 | 93.4  | 300.3 | 3.7 | 15.8 | 3.5 | 15.8 | 1.8 | 14.7 | 27.3 | 114.7 | 289.6 | 4.59 |
| 103 | S103 | 13.0 | 3.9 | 13.0 | 2.1 | 15.3 | 29.7 | 97.2  | 230.0 | 3.9 | 15.0 | 3.8 | 15.1 | 1.9 | 15.3 | 33.0 | 110.7 | 219.4 | 4.43 |
| 104 | S104 | 13.7 | 3.9 | 13.7 | 2.2 | 13.3 | 29.0 | 97.6  | 278.0 | 3.9 | 15.3 | 3.7 | 15.3 | 1.9 | 14.0 | 30.7 | 117.3 | 279.0 | 4.69 |
| 105 | S105 | 11.0 | 3.8 | 11.7 | 2.2 | 13.3 | 20.7 | 55.2  | 305.3 | 2.2 | 14.7 | 3.9 | 15.1 | 2.1 | 14.7 | 24.0 | 93.0  | 266.1 | 3.72 |
| 106 | S106 | 13.7 | 4.2 | 13.7 | 2.4 | 14.7 | 30.3 | 103.5 | 263.3 | 4.1 | 15.7 | 4.0 | 15.6 | 2.2 | 15.3 | 31.7 | 120.1 | 248.6 | 4.80 |
| 107 | S107 | 10.7 | 3.8 | 11.0 | 2.2 | 12.0 | 22.3 | 67.9  | 300.3 | 2.7 | 13.2 | 3.6 | 13.1 | 1.9 | 12.7 | 25.3 | 94.3  | 295.4 | 3.77 |
| 108 | S108 | 10.7 | 4.2 | 11.0 | 2.4 | 14.0 | 23.3 | 72.3  | 253.3 | 2.9 | 16.2 | 4.5 | 16.0 | 2.6 | 16.0 | 27.7 | 126.5 | 286.7 | 5.06 |
| 109 | S109 | 11.7 | 4.1 | 12.3 | 2.3 | 14.0 | 22.0 | 81.8  | 329.3 | 3.3 | 18.1 | 4.1 | 18.0 | 2.0 | 17.3 | 29.7 | 144.5 | 281.9 | 5.78 |
| 110 | S110 | 14.7 | 4.2 | 14.7 | 2.2 | 15.3 | 27.3 | 115.6 | 306.3 | 4.6 | 15.5 | 3.8 | 15.2 | 1.9 | 14.0 | 27.3 | 122.8 | 324.6 | 4.91 |
| 111 | S111 | 13.0 | 3.9 | 13.0 | 2.1 | 14.7 | 26.3 | 82.2  | 298.0 | 3.3 | 15.2 | 3.5 | 14.7 | 1.9 | 14.0 | 25.7 | 101.6 | 284.5 | 4.06 |
| 112 | S112 | 17.0 | 3.8 | 17.0 | 2.0 | 16.0 | 33.3 | 117.8 | 283.0 | 4.7 | 18.1 | 3.5 | 18.3 | 1.6 | 16.0 | 31.7 | 130.5 | 259.5 | 5.22 |

|     |      |      |     |      |     |      |      |       |       |     |      |     |      |     |      |      |       |       |      |
|-----|------|------|-----|------|-----|------|------|-------|-------|-----|------|-----|------|-----|------|------|-------|-------|------|
| 113 | S113 | 14.0 | 4.0 | 14.0 | 2.3 | 14.7 | 33.3 | 94.9  | 215.3 | 3.8 | 15.3 | 3.5 | 15.3 | 1.8 | 14.7 | 30.3 | 101.2 | 227.5 | 4.05 |
| 114 | S114 | 11.0 | 4.7 | 11.0 | 2.8 | 18.7 | 24.0 | 91.7  | 224.3 | 3.7 | 12.7 | 4.6 | 12.2 | 2.6 | 18.0 | 25.3 | 109.7 | 239.0 | 4.39 |
| 115 | S115 | 15.0 | 4.2 | 15.0 | 2.4 | 13.3 | 30.7 | 106.6 | 272.3 | 4.3 | 14.6 | 3.7 | 14.1 | 2.0 | 12.7 | 29.3 | 104.0 | 277.8 | 4.16 |
| 116 | S116 | 12.0 | 3.8 | 12.0 | 2.3 | 13.3 | 23.3 | 78.3  | 313.7 | 3.1 | 13.8 | 3.6 | 13.7 | 1.9 | 12.7 | 24.3 | 95.2  | 308.9 | 3.81 |
| 117 | S117 | 12.3 | 4.2 | 12.3 | 2.4 | 15.3 | 24.7 | 96.2  | 251.7 | 3.8 | 14.5 | 4.3 | 14.0 | 2.2 | 15.3 | 28.0 | 129.7 | 304.2 | 5.19 |
| 118 | S118 | 13.0 | 4.4 | 13.3 | 2.6 | 14.7 | 23.0 | 84.7  | 305.7 | 3.4 | 13.9 | 4.2 | 13.6 | 2.4 | 16.0 | 23.3 | 112.9 | 304.2 | 4.51 |
| 119 | S119 | 14.7 | 3.7 | 16.0 | 2.3 | 12.7 | 25.3 | 71.8  | 254.0 | 2.9 | 17.6 | 3.8 | 17.6 | 2.1 | 12.7 | 32.7 | 124.2 | 299.9 | 4.97 |
| 120 | S120 | 13.7 | 4.3 | 14.7 | 2.6 | 15.3 | 26.0 | 100.4 | 295.3 | 4.0 | 17.0 | 4.2 | 17.3 | 2.5 | 14.0 | 31.7 | 129.6 | 292.9 | 5.18 |
| 121 | S121 | 13.0 | 4.2 | 13.7 | 2.5 | 12.7 | 28.0 | 88.8  | 288.0 | 3.6 | 14.9 | 4.1 | 14.6 | 2.3 | 16.0 | 30.7 | 136.1 | 277.6 | 5.44 |
| 122 | S122 | 13.0 | 4.3 | 13.0 | 2.4 | 14.0 | 25.0 | 92.4  | 284.3 | 3.7 | 14.2 | 4.1 | 14.3 | 2.2 | 15.3 | 25.7 | 120.9 | 308.2 | 4.84 |
| 123 | S123 | 16.3 | 3.9 | 17.0 | 2.1 | 14.7 | 33.0 | 124.3 | 280.0 | 5.0 | 17.5 | 3.8 | 17.2 | 2.0 | 16.7 | 35.3 | 137.6 | 236.4 | 5.51 |
| 124 | S124 | 13.7 | 4.2 | 14.3 | 2.2 | 15.3 | 24.7 | 103.3 | 318.3 | 4.1 | 16.0 | 4.1 | 16.0 | 2.1 | 15.3 | 24.7 | 111.8 | 294.7 | 4.47 |
| 125 | S125 | 13.7 | 4.0 | 14.0 | 2.3 | 12.7 | 21.3 | 78.7  | 313.7 | 3.1 | 16.7 | 3.8 | 16.5 | 2.1 | 12.7 | 27.0 | 105.3 | 308.9 | 4.21 |
| 126 | S126 | 13.3 | 3.9 | 14.0 | 2.3 | 16.0 | 22.7 | 91.0  | 285.3 | 3.6 | 16.5 | 3.6 | 16.6 | 2.0 | 15.3 | 26.7 | 89.7  | 219.9 | 3.59 |
| 127 | S127 | 12.7 | 4.2 | 13.3 | 2.5 | 14.7 | 24.3 | 96.9  | 322.3 | 3.9 | 18.2 | 4.3 | 18.1 | 2.5 | 16.7 | 30.7 | 150.9 | 299.7 | 6.04 |
| 128 | S128 | 12.7 | 4.3 | 12.7 | 2.6 | 18.7 | 23.7 | 90.1  | 268.3 | 3.6 | 13.5 | 4.2 | 13.7 | 2.5 | 17.3 | 21.0 | 92.3  | 249.2 | 3.69 |
| 129 | S129 | 13.3 | 4.3 | 13.3 | 2.4 | 16.0 | 30.7 | 103.4 | 229.0 | 4.1 | 15.6 | 4.1 | 15.2 | 2.2 | 17.3 | 32.7 | 134.1 | 237.5 | 5.36 |
| 130 | S130 | 11.7 | 3.8 | 11.7 | 2.2 | 14.0 | 22.0 | 72.0  | 299.7 | 2.9 | 15.2 | 4.0 | 15.1 | 2.2 | 15.3 | 26.3 | 122.7 | 306.0 | 4.91 |
| 131 | S131 | 13.0 | 4.0 | 13.0 | 2.3 | 14.7 | 29.3 | 100.4 | 287.0 | 4.0 | 14.5 | 3.9 | 14.7 | 2.2 | 17.3 | 29.3 | 113.5 | 224.8 | 4.54 |
| 132 | S132 | 15.3 | 4.1 | 15.7 | 2.4 | 13.3 | 24.7 | 116.1 | 354.3 | 4.6 | 18.0 | 4.0 | 18.0 | 2.1 | 14.0 | 28.7 | 133.9 | 332.4 | 5.36 |
| 133 | S133 | 12.0 | 3.7 | 12.0 | 2.4 | 15.3 | 23.0 | 50.3  | 178.7 | 2.0 | 12.6 | 3.3 | 12.4 | 1.9 | 16.0 | 23.7 | 57.6  | 151.8 | 2.30 |
| 134 | S134 | 10.7 | 4.2 | 10.7 | 2.3 | 17.3 | 23.3 | 81.9  | 255.7 | 3.3 | 12.0 | 4.0 | 11.7 | 2.3 | 18.0 | 23.7 | 99.0  | 232.1 | 3.96 |
| 135 | S135 | 12.0 | 3.8 | 12.0 | 2.1 | 14.0 | 21.0 | 72.2  | 290.7 | 2.9 | 13.7 | 3.9 | 13.3 | 2.0 | 16.0 | 24.0 | 93.4  | 247.6 | 3.74 |
| 136 | S136 | 11.3 | 4.1 | 11.3 | 2.3 | 14.7 | 20.0 | 75.5  | 323.0 | 3.0 | 14.3 | 3.9 | 14.5 | 2.3 | 13.3 | 22.3 | 99.3  | 325.9 | 3.97 |
| 137 | S137 | 12.0 | 4.2 | 12.3 | 2.4 | 18.7 | 22.3 | 90.0  | 243.0 | 3.6 | 15.0 | 4.1 | 14.8 | 2.3 | 20.7 | 25.3 | 116.1 | 223.0 | 4.64 |
| 138 | S138 | 11.3 | 4.2 | 11.3 | 2.4 | 19.3 | 21.7 | 82.4  | 245.7 | 3.3 | 14.9 | 4.3 | 14.5 | 2.4 | 20.0 | 29.3 | 147.3 | 252.4 | 5.89 |
| 139 | S139 | 12.3 | 3.9 | 12.5 | 2.2 | 14.0 | 27.3 | 91.4  | 266.0 | 3.7 | 13.9 | 3.8 | 13.5 | 1.8 | 13.3 | 30.7 | 113.3 | 279.9 | 4.53 |
| 140 | S140 | 13.0 | 4.1 | 13.0 | 2.2 | 14.0 | 2.2  | 76.3  | 384.0 | 3.1 | 15.9 | 3.7 | 15.8 | 2.1 | 14.7 | 22.0 | 80.4  | 245.9 | 3.22 |
| 141 | S141 | 12.3 | 4.0 | 15.7 | 2.3 | 13.3 | 27.3 | 83.3  | 259.3 | 3.3 | 16.9 | 4.0 | 16.1 | 2.1 | 16.0 | 34.0 | 122.9 | 226.0 | 4.92 |
| 142 | S142 | 13.0 | 4.1 | 13.0 | 2.7 | 16.0 | 25.3 | 80.4  | 257.7 | 3.2 | 14.2 | 4.0 | 14.3 | 2.5 | 14.7 | 26.7 | 92.2  | 237.6 | 3.69 |
| 143 | S143 | 11.0 | 3.7 | 11.0 | 2.1 | 12.7 | 18.0 | 61.8  | 341.7 | 2.5 | 13.5 | 3.5 | 13.5 | 1.7 | 12.7 | 21.3 | 86.2  | 320.5 | 3.45 |
| 144 | S144 | 13.7 | 4.6 | 13.7 | 2.5 | 15.3 | 26.0 | 132.5 | 342.3 | 5.3 | 14.9 | 4.3 | 14.4 | 2.3 | 15.3 | 26.0 | 137.3 | 345.1 | 5.49 |
| 145 | S145 | 12.0 | 4.3 | 12.0 | 2.6 | 16.0 | 18.0 | 77.9  | 358.0 | 3.1 | 15.1 | 4.3 | 14.6 | 2.7 | 16.7 | 24.0 | 126.2 | 301.5 | 5.05 |
| 146 | S146 | 15.0 | 4.1 | 15.0 | 2.2 | 13.3 | 31.3 | 108.7 | 312.3 | 4.3 | 16.1 | 3.7 | 15.6 | 1.8 | 13.3 | 30.3 | 121.5 | 302.2 | 4.86 |
| 147 | S147 | 11.0 | 3.9 | 11.0 | 2.1 | 14.0 | 21.0 | 82.8  | 352.0 | 3.3 | 12.1 | 3.6 | 11.6 | 1.7 | 13.3 | 21.3 | 84.9  | 300.5 | 3.40 |
| 148 | S148 | 14.3 | 4.0 | 14.3 | 2.2 | 14.7 | 29.3 | 102.1 | 262.7 | 4.1 | 14.8 | 3.4 | 14.4 | 1.7 | 12.7 | 30.0 | 92.5  | 245.1 | 3.70 |
| 149 | S149 | 13.7 | 3.9 | 14.3 | 2.2 | 15.3 | 23.0 | 93.7  | 345.3 | 3.7 | 15.7 | 3.8 | 15.2 | 1.9 | 16.0 | 23.3 | 108.2 | 290.3 | 4.33 |
| 150 | S150 | 15.0 | 4.4 | 15.7 | 2.5 | 16.7 | 28.7 | 116.1 | 303.7 | 4.6 | 18.2 | 4.1 | 18.1 | 2.2 | 14.7 | 33.7 | 135.5 | 274.9 | 5.42 |
| 151 | K001 | 15.7 | 4.2 | 16.0 | 2.3 | 15.3 | 23.7 | 103.5 | 334.0 | 4.1 | 19.1 | 3.9 | 18.8 | 2.2 | 15.3 | 27.7 | 122.9 | 285.0 | 4.92 |
| 152 | K002 | 16.7 | 4.0 | 16.7 | 2.3 | 14.7 | 27.0 | 119.6 | 399.7 | 4.8 | 17.9 | 4.1 | 17.9 | 1.9 | 14.7 | 29.0 | 144.7 | 341.7 | 5.79 |

|     |      |      |     |      |     |      |      |       |       |     |      |     |      |     |      |      |       |       |      |
|-----|------|------|-----|------|-----|------|------|-------|-------|-----|------|-----|------|-----|------|------|-------|-------|------|
| 153 | K003 | 11.0 | 4.1 | 11.0 | 2.1 | 15.3 | 21.0 | 84.3  | 283.7 | 3.4 | 14.7 | 3.9 | 14.3 | 1.8 | 16.0 | 28.3 | 120.0 | 264.4 | 4.80 |
| 154 | K004 | 13.0 | 4.3 | 13.0 | 2.4 | 17.3 | 26.3 | 96.5  | 264.7 | 3.9 | 15.0 | 4.2 | 14.7 | 2.5 | 18.0 | 28.3 | 112.4 | 222.9 | 4.50 |
| 155 | K005 | 13.0 | 4.1 | 14.0 | 2.3 | 14.0 | 22.7 | 96.4  | 377.7 | 3.9 | 16.6 | 4.1 | 16.2 | 2.3 | 14.7 | 29.0 | 132.5 | 313.8 | 5.30 |
| 156 | K006 | 14.3 | 3.8 | 14.3 | 2.3 | 13.3 | 23.3 | 75.8  | 263.3 | 3.0 | 16.9 | 3.4 | 16.3 | 1.8 | 12.7 | 28.7 | 99.3  | 272.1 | 3.97 |
| 157 | K007 | 14.3 | 3.9 | 14.3 | 2.2 | 12.7 | 29.3 | 106.7 | 312.3 | 4.3 | 17.7 | 3.6 | 18.0 | 1.9 | 12.7 | 31.3 | 121.9 | 309.9 | 4.88 |
| 158 | K008 | 14.7 | 3.5 | 15.0 | 2.0 | 14.0 | 27.0 | 78.4  | 263.7 | 3.1 | 17.4 | 3.4 | 16.8 | 1.7 | 15.3 | 30.7 | 103.2 | 218.6 | 4.13 |
| 159 | K009 | 14.7 | 3.9 | 14.7 | 2.3 | 14.0 | 27.0 | 96.0  | 298.0 | 3.8 | 17.7 | 3.7 | 17.2 | 1.9 | 16.0 | 32.3 | 135.2 | 261.4 | 5.41 |
| 160 | K010 | 13.0 | 3.8 | 13.7 | 2.3 | 14.0 | 21.0 | 72.1  | 293.0 | 2.9 | 17.3 | 3.8 | 17.4 | 2.0 | 14.7 | 28.7 | 116.9 | 279.3 | 4.68 |
| 161 | K011 | 14.0 | 3.9 | 14.0 | 2.2 | 13.3 | 27.0 | 87.4  | 258.0 | 3.5 | 16.6 | 3.8 | 16.7 | 2.0 | 14.0 | 30.7 | 120.4 | 280.2 | 4.82 |
| 162 | K012 | 14.7 | 3.9 | 14.7 | 2.3 | 13.3 | 31.3 | 102.0 | 294.0 | 4.1 | 17.5 | 3.7 | 17.3 | 2.1 | 14.7 | 29.3 | 127.6 | 298.7 | 5.11 |
| 163 | K013 | 12.0 | 4.2 | 12.0 | 2.4 | 15.3 | 24.0 | 93.3  | 310.3 | 3.7 | 14.7 | 4.3 | 14.5 | 2.4 | 18.0 | 26.0 | 115.1 | 245.7 | 4.61 |
| 164 | K014 | 15.0 | 4.3 | 15.0 | 2.6 | 15.3 | 26.0 | 108.6 | 326.3 | 4.3 | 17.9 | 4.4 | 17.5 | 2.5 | 16.7 | 31.3 | 135.0 | 259.6 | 5.40 |
| 165 | K015 | 12.3 | 4.4 | 12.3 | 2.5 | 14.7 | 24.7 | 116.8 | 343.3 | 4.7 | 11.9 | 4.3 | 11.1 | 2.5 | 18.7 | 22.3 | 122.3 | 298.2 | 4.89 |
| 166 | K016 | 15.0 | 3.8 | 15.8 | 2.3 | 14.0 | 23.3 | 84.8  | 328.0 | 3.4 | 18.0 | 3.8 | 18.1 | 2.3 | 16.7 | 27.3 | 130.9 | 288.7 | 5.24 |
| 167 | K017 | 15.0 | 4.0 | 15.0 | 2.2 | 14.0 | 27.7 | 106.4 | 318.7 | 4.3 | 16.9 | 3.8 | 16.7 | 1.9 | 12.7 | 26.7 | 101.6 | 298.8 | 4.06 |
| 168 | K018 | 12.3 | 4.4 | 12.7 | 2.3 | 16.7 | 24.0 | 99.8  | 326.7 | 4.0 | 14.8 | 4.0 | 14.5 | 2.2 | 16.0 | 25.7 | 115.7 | 280.9 | 4.63 |
| 169 | K019 | 15.0 | 4.4 | 15.0 | 2.5 | 14.7 | 30.7 | 127.8 | 330.7 | 5.1 | 16.4 | 4.3 | 16.0 | 2.3 | 13.3 | 26.0 | 123.1 | 357.4 | 4.93 |
| 170 | K020 | 13.0 | 4.2 | 13.0 | 2.4 | 14.7 | 20.3 | 78.6  | 348.3 | 3.1 | 16.2 | 3.9 | 16.0 | 2.3 | 14.7 | 18.7 | 70.9  | 250.9 | 2.84 |
| 171 | K021 | 14.0 | 3.7 | 14.0 | 2.1 | 15.3 | 24.3 | 86.1  | 293.3 | 3.4 | 16.5 | 3.4 | 16.0 | 1.8 | 13.3 | 29.7 | 92.7  | 236.6 | 3.71 |
| 172 | K022 | 11.7 | 3.7 | 11.7 | 2.2 | 14.7 | 21.0 | 57.3  | 235.0 | 2.3 | 12.5 | 3.8 | 12.4 | 2.1 | 16.0 | 22.0 | 81.5  | 234.1 | 3.26 |
| 173 | K023 | 13.0 | 4.3 | 13.3 | 2.7 | 16.7 | 25.3 | 89.1  | 273.3 | 3.6 | 14.6 | 3.9 | 14.8 | 2.4 | 15.3 | 23.3 | 93.1  | 266.0 | 3.73 |
| 174 | K024 | 13.7 | 4.4 | 13.7 | 2.4 | 20.0 | 27.3 | 93.6  | 222.0 | 3.7 | 14.1 | 4.3 | 14.4 | 2.3 | 22.0 | 26.0 | 110.4 | 193.0 | 4.42 |
| 175 | K025 | 15.3 | 4.5 | 15.3 | 2.5 | 18.0 | 28.0 | 118.8 | 262.7 | 4.8 | 16.0 | 4.0 | 16.4 | 2.0 | 16.7 | 26.7 | 104.6 | 235.0 | 4.18 |
| 176 | K026 | 12.3 | 4.1 | 12.3 | 2.3 | 16.0 | 24.0 | 84.1  | 260.3 | 3.4 | 14.6 | 3.8 | 14.1 | 1.9 | 16.0 | 28.0 | 107.5 | 240.3 | 4.30 |
| 177 | K027 | 12.0 | 4.0 | 12.0 | 2.3 | 15.3 | 31.0 | 92.3  | 199.0 | 3.7 | 13.5 | 4.3 | 12.7 | 2.0 | 18.7 | 31.3 | 112.8 | 193.2 | 4.51 |
| 178 | K028 | 13.0 | 4.4 | 13.0 | 2.6 | 16.0 | 27.0 | 100.3 | 261.3 | 4.0 | 14.9 | 4.3 | 14.9 | 2.5 | 14.7 | 28.0 | 101.9 | 244.9 | 4.08 |
| 179 | K029 | 15.0 | 3.9 | 15.3 | 2.2 | 13.3 | 30.3 | 99.5  | 270.3 | 4.0 | 16.8 | 3.9 | 16.9 | 2.2 | 15.3 | 29.7 | 121.1 | 267.8 | 4.84 |
| 180 | K030 | 14.0 | 4.2 | 14.0 | 2.1 | 16.0 | 32.0 | 109.5 | 228.0 | 4.4 | 16.2 | 4.2 | 15.9 | 2.1 | 16.7 | 32.0 | 128.4 | 240.3 | 5.14 |
| 181 | K031 | 12.7 | 4.4 | 14.7 | 2.3 | 14.0 | 30.3 | 123.6 | 327.3 | 4.9 | 15.0 | 4.0 | 14.7 | 2.2 | 14.0 | 30.3 | 120.0 | 281.0 | 4.80 |
| 182 | K032 | 12.3 | 3.9 | 12.3 | 2.2 | 12.7 | 24.3 | 78.9  | 311.7 | 3.2 | 13.9 | 3.7 | 13.8 | 2.2 | 14.0 | 20.3 | 74.4  | 261.3 | 2.97 |
| 183 | K033 | 13.0 | 4.1 | 13.3 | 2.4 | 19.3 | 28.0 | 101.8 | 234.3 | 4.1 | 15.8 | 3.9 | 16.1 | 2.2 | 16.7 | 30.3 | 105.8 | 209.7 | 4.23 |
| 184 | K034 | 11.3 | 4.6 | 11.3 | 2.6 | 17.3 | 22.0 | 90.6  | 286.0 | 3.6 | 13.7 | 4.4 | 13.4 | 2.3 | 17.3 | 26.7 | 113.8 | 246.6 | 4.55 |
| 185 | K035 | 13.0 | 4.2 | 13.3 | 2.4 | 12.0 | 26.0 | 109.0 | 378.0 | 4.4 | 14.8 | 4.1 | 14.2 | 2.1 | 14.0 | 24.7 | 115.8 | 339.8 | 4.63 |
| 186 | K036 | 13.7 | 4.2 | 14.0 | 2.4 | 14.7 | 28.7 | 114.7 | 308.0 | 4.6 | 14.2 | 4.0 | 14.0 | 1.9 | 14.0 | 26.3 | 119.5 | 324.9 | 4.78 |
